# Supplementary material
Source: publisher figshare collection journal article supplement (https://wiley.figshare.com/ndownloader/files/15164303)

a)

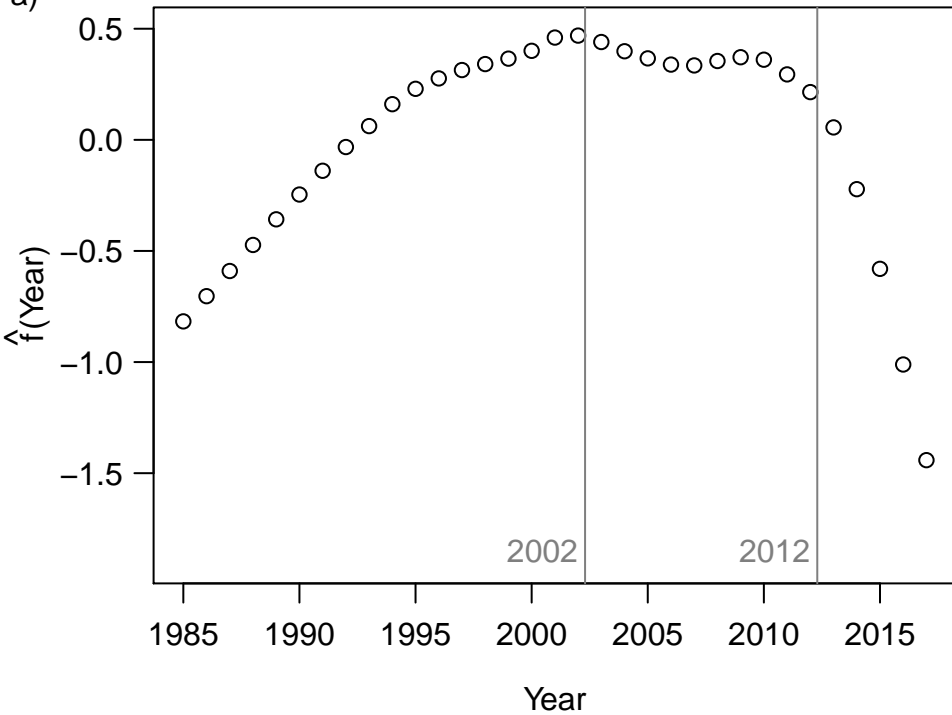

b)

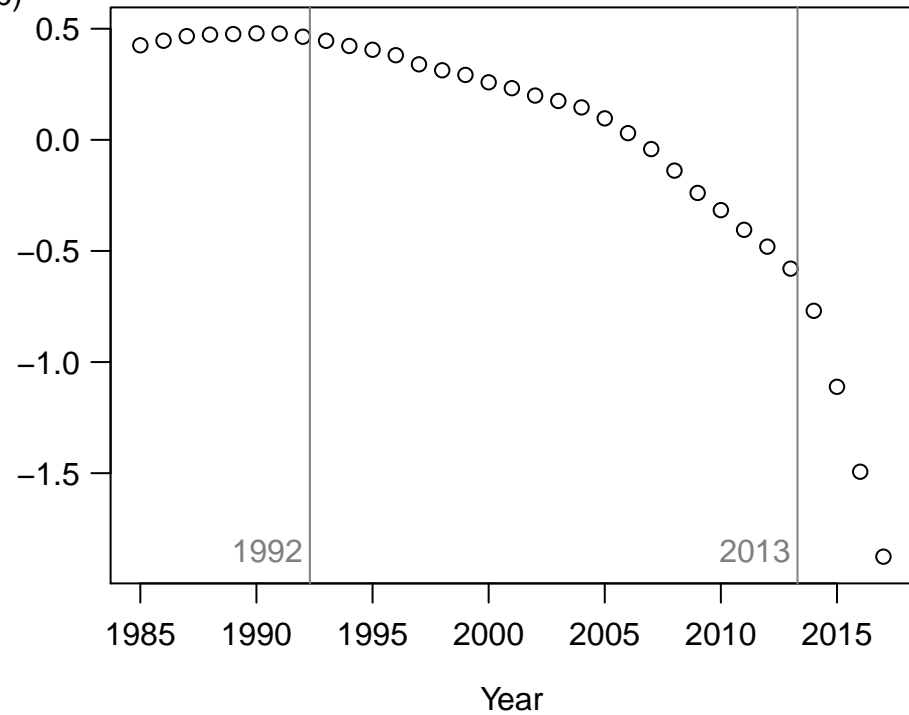

Supplement: Supplementary file 1 [file 15164303]

d)

Late summer anoxic volume ( $\text{km}^3$ )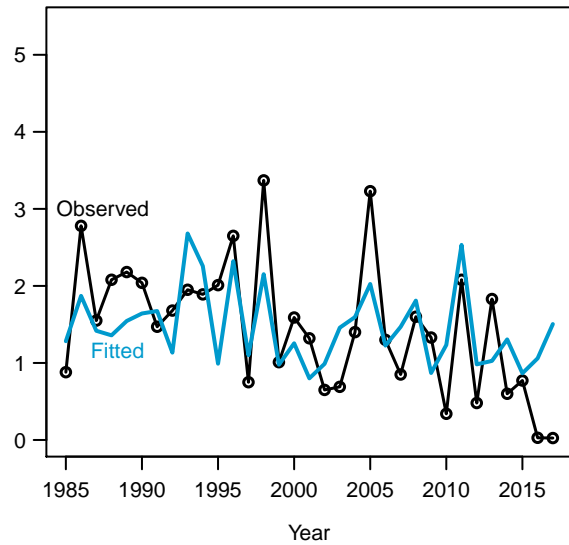

e)

Residuals ( $\text{km}^3$ )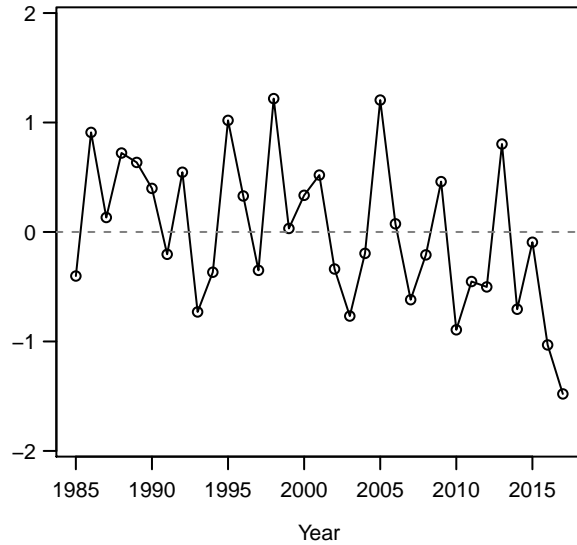

f)

ACF of residuals

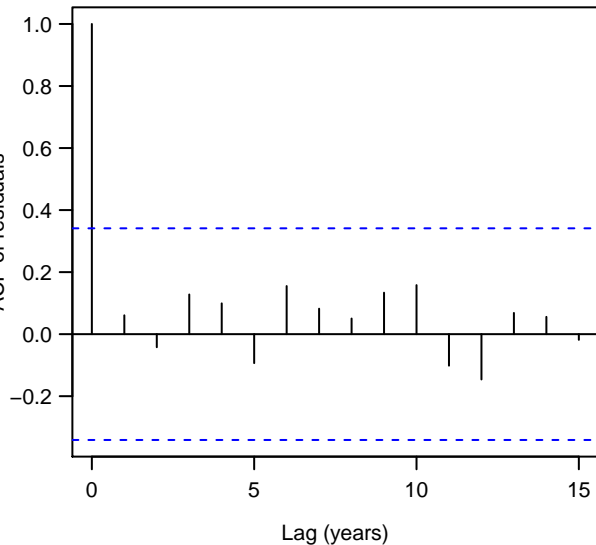

Supplement: Supplementary file 2 [file 15164303]

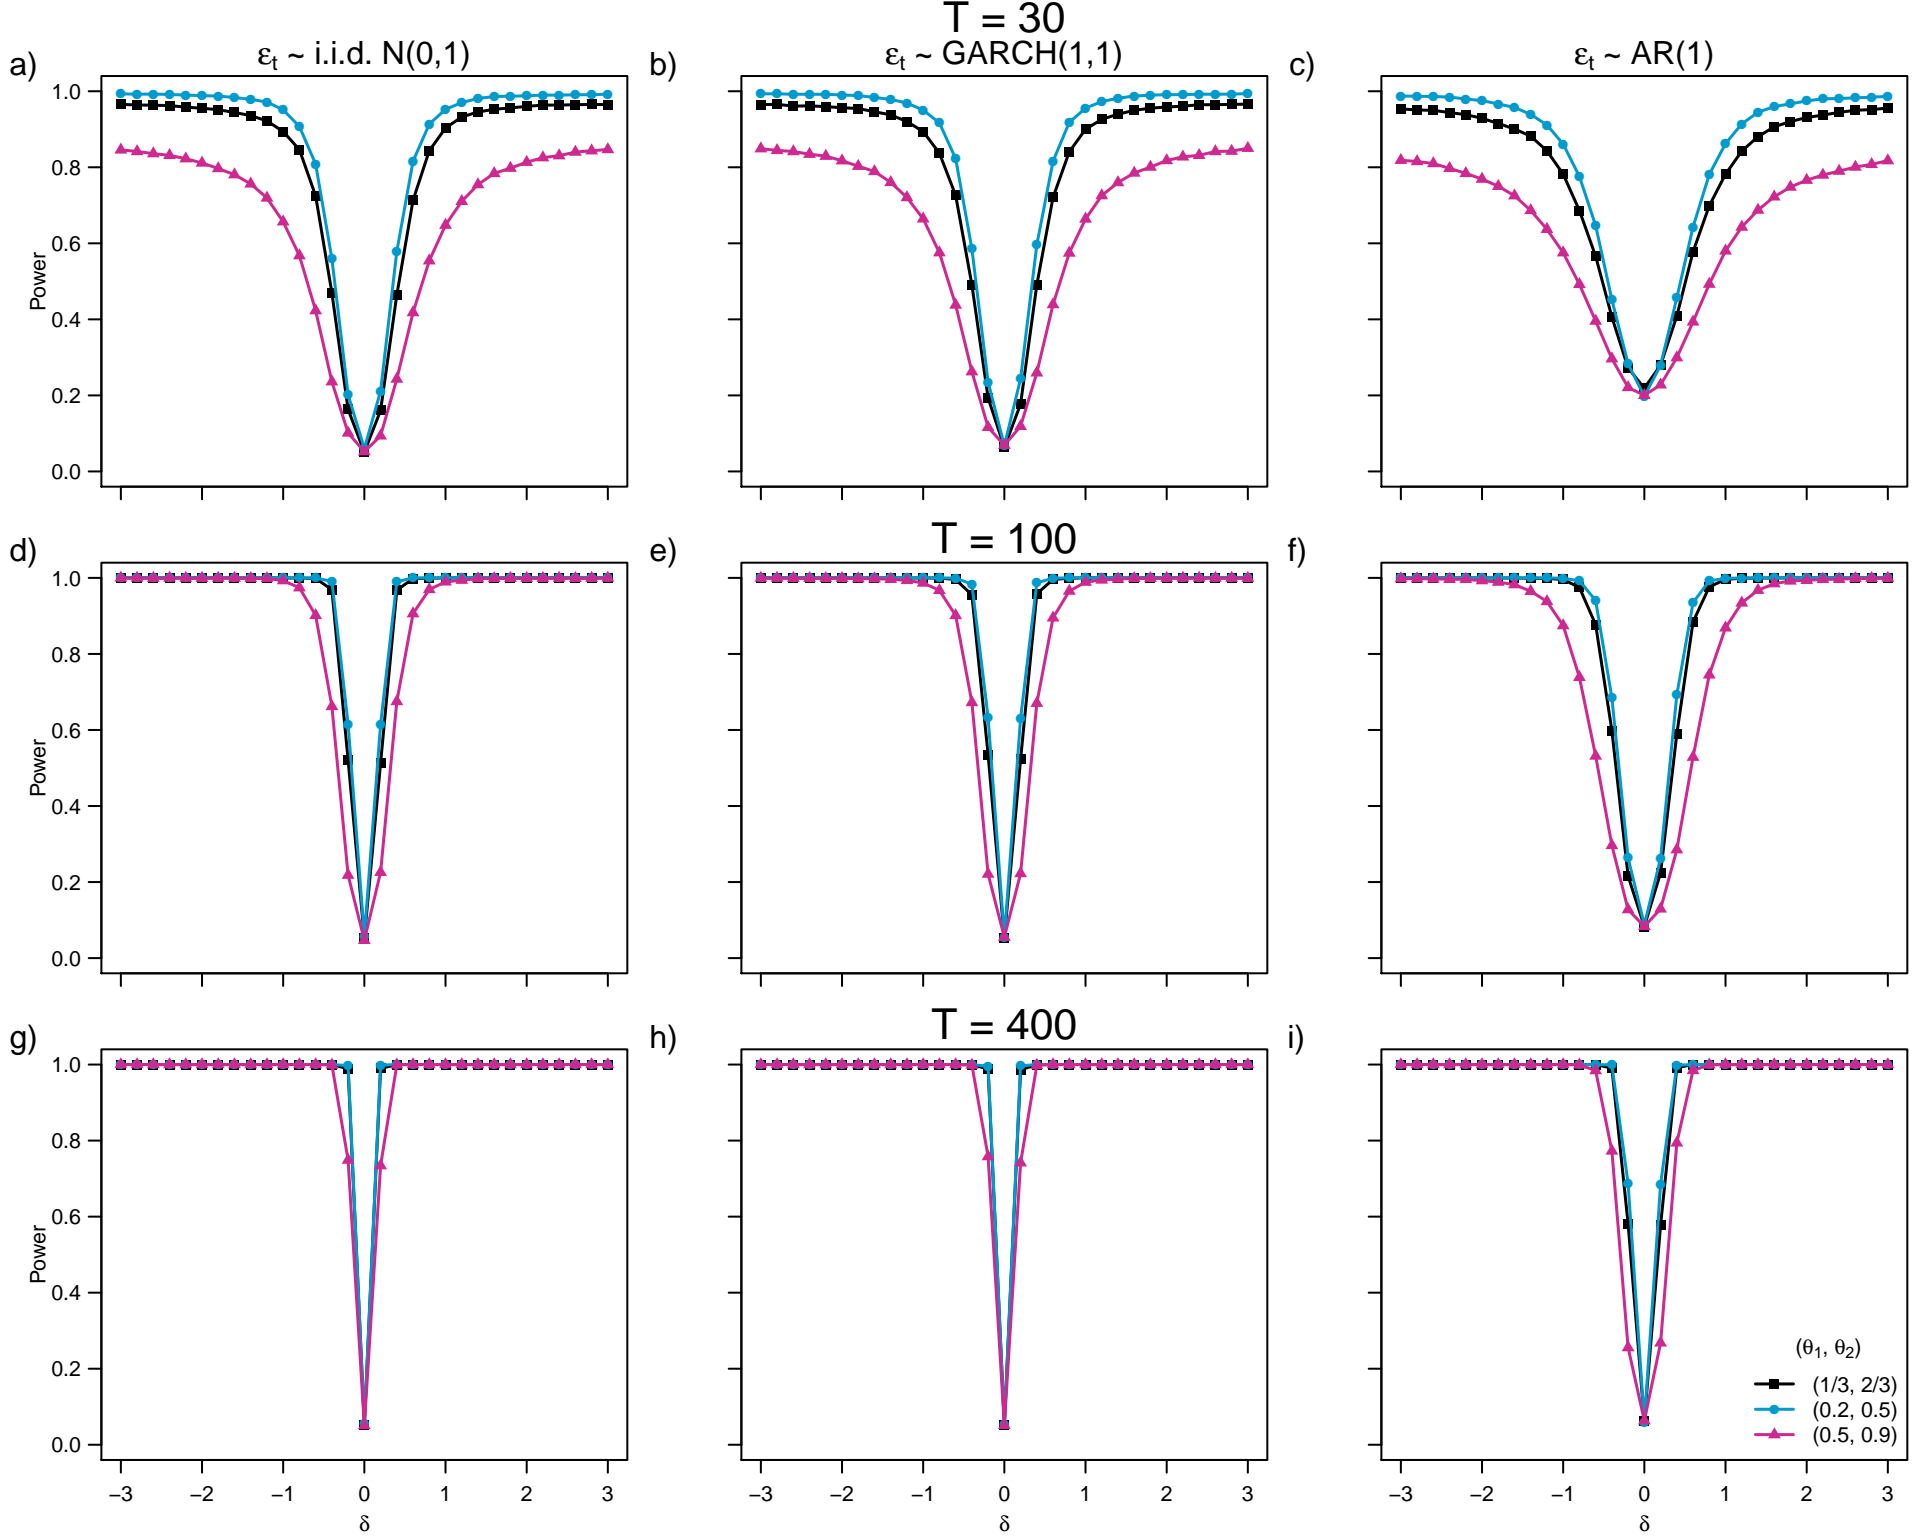

Supplement: Supplementary file 3 [file 15164303]

a)

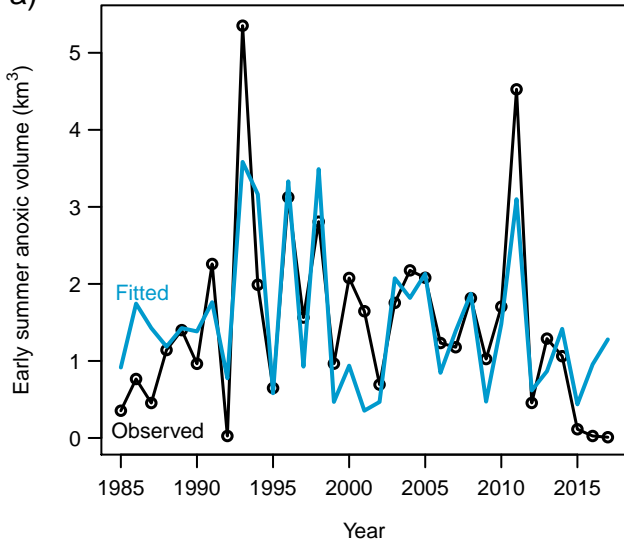

b)

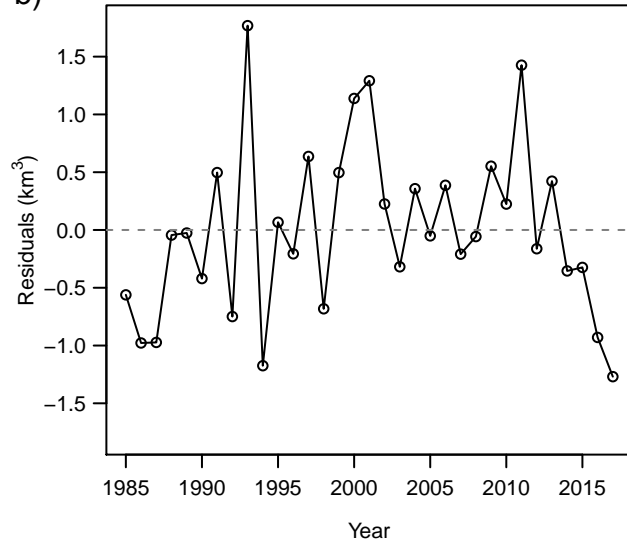

c)

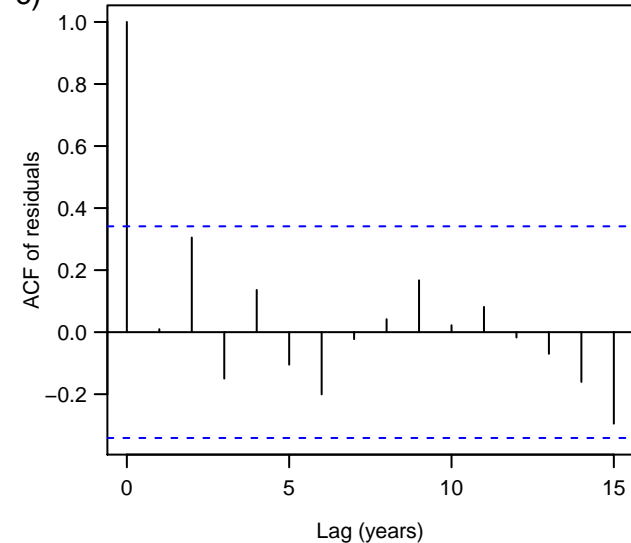

Supplement: Supplementary file 6 [file 15164303]

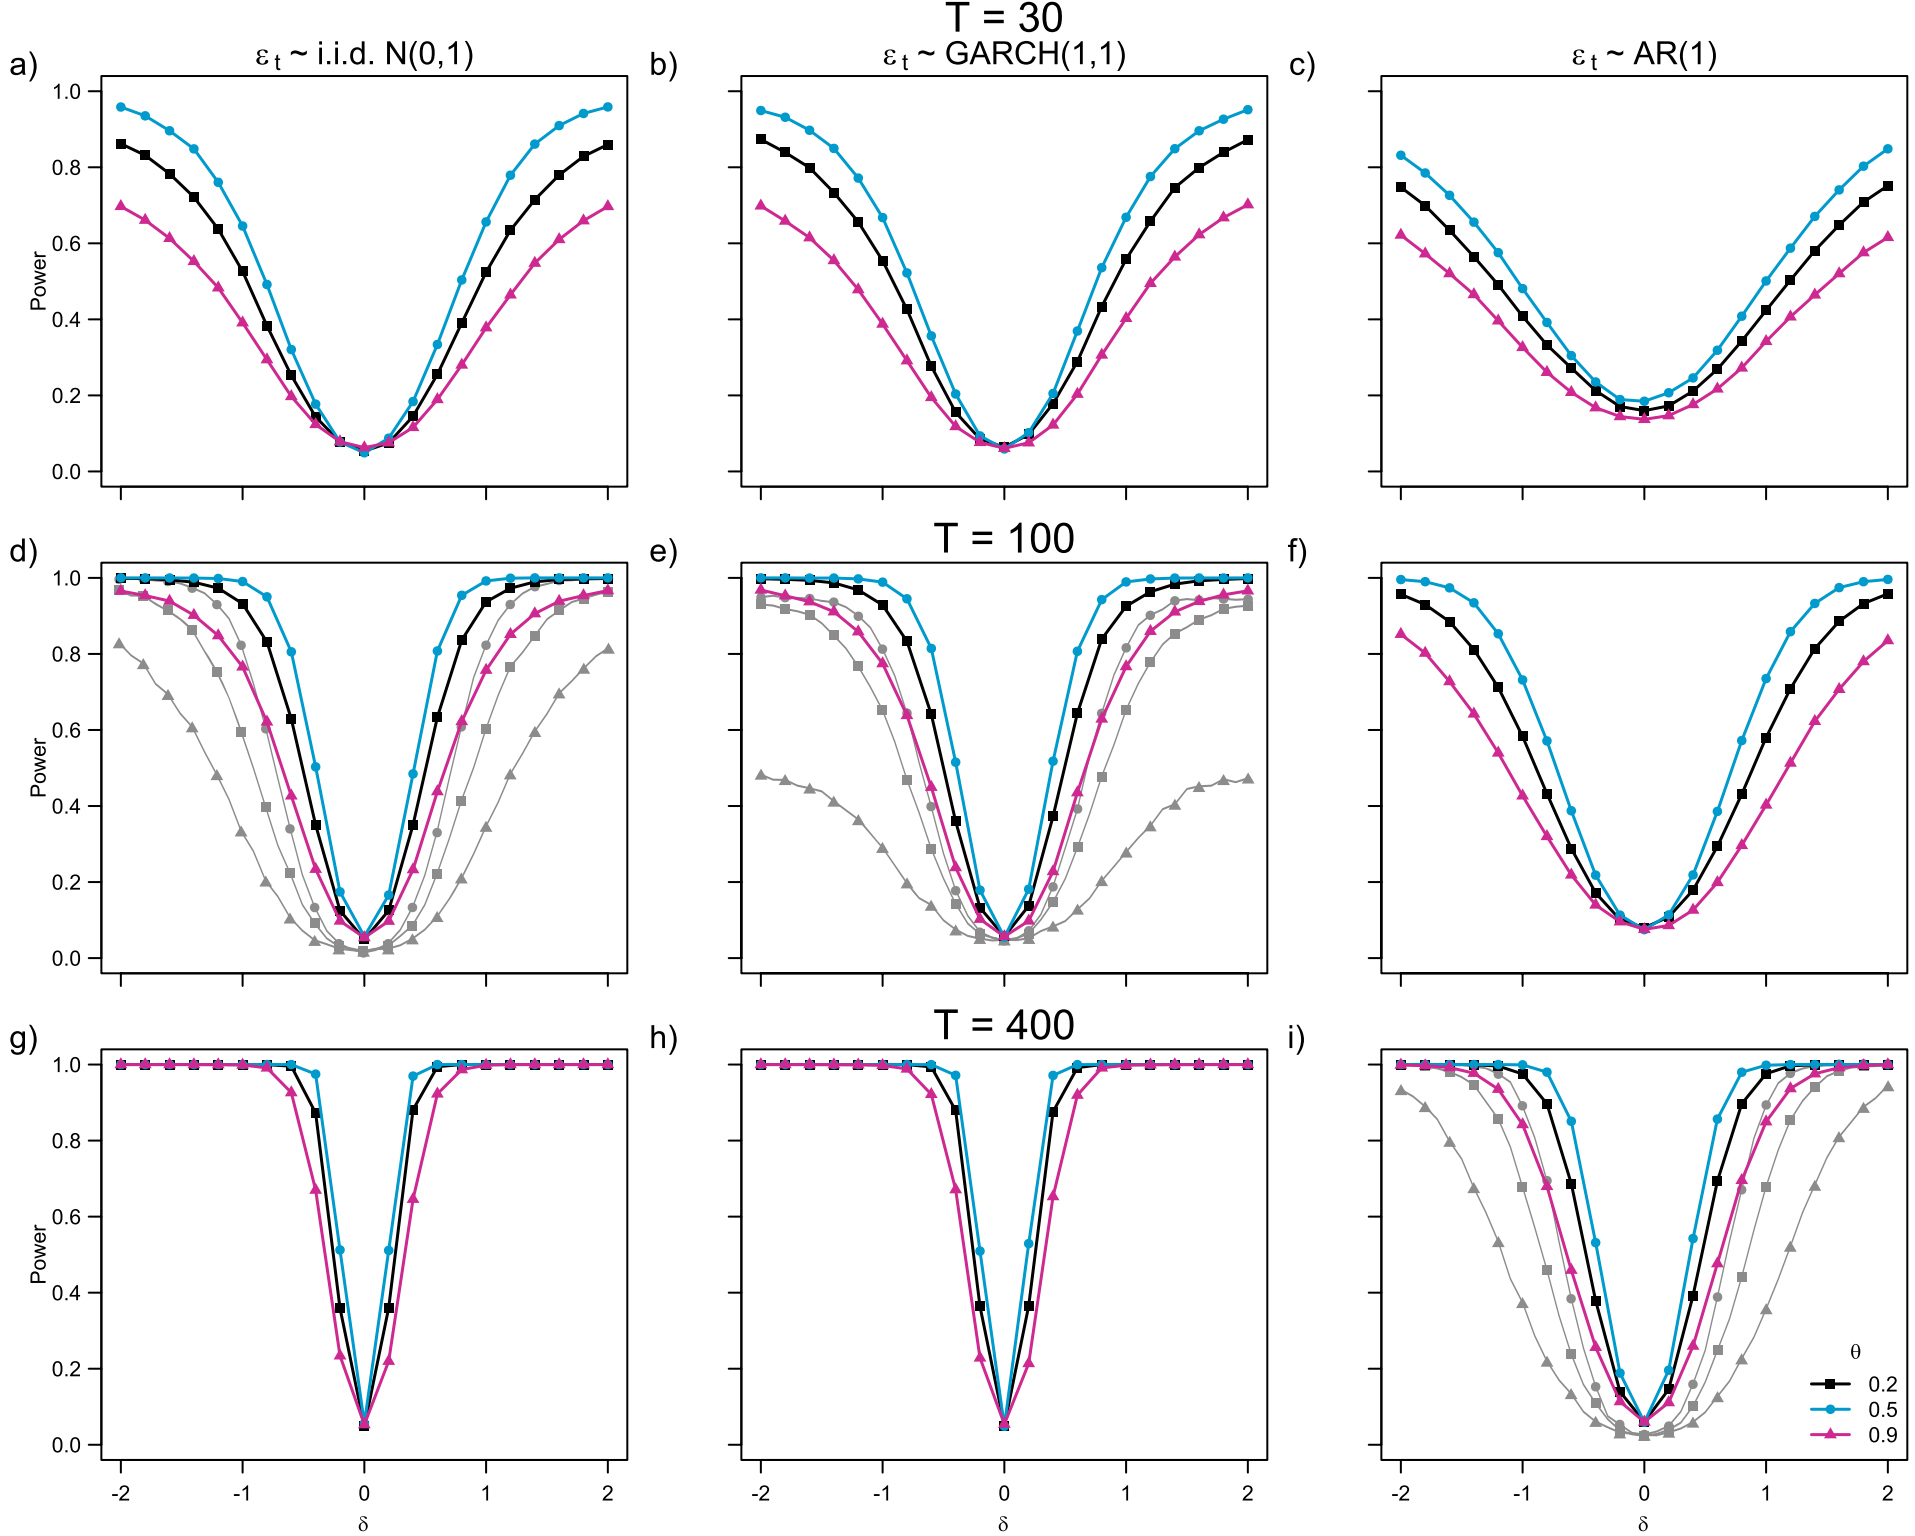

Supplement: Supplementary file 7 [file 15164303]

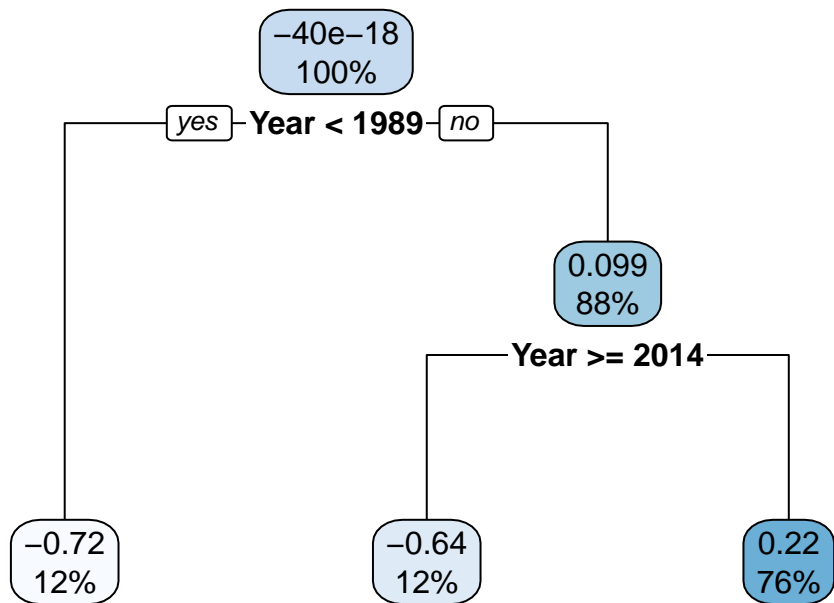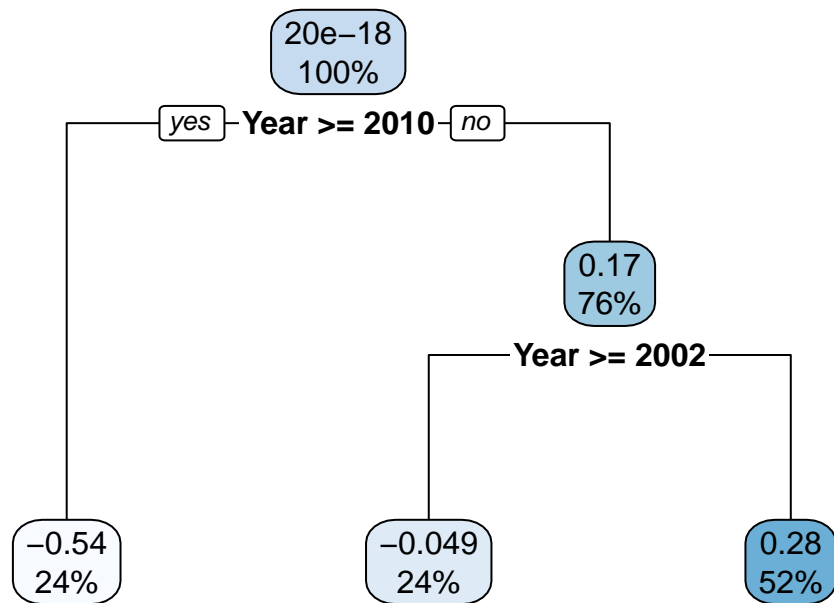

Supplement: Supplementary file 8 [file 15164303]

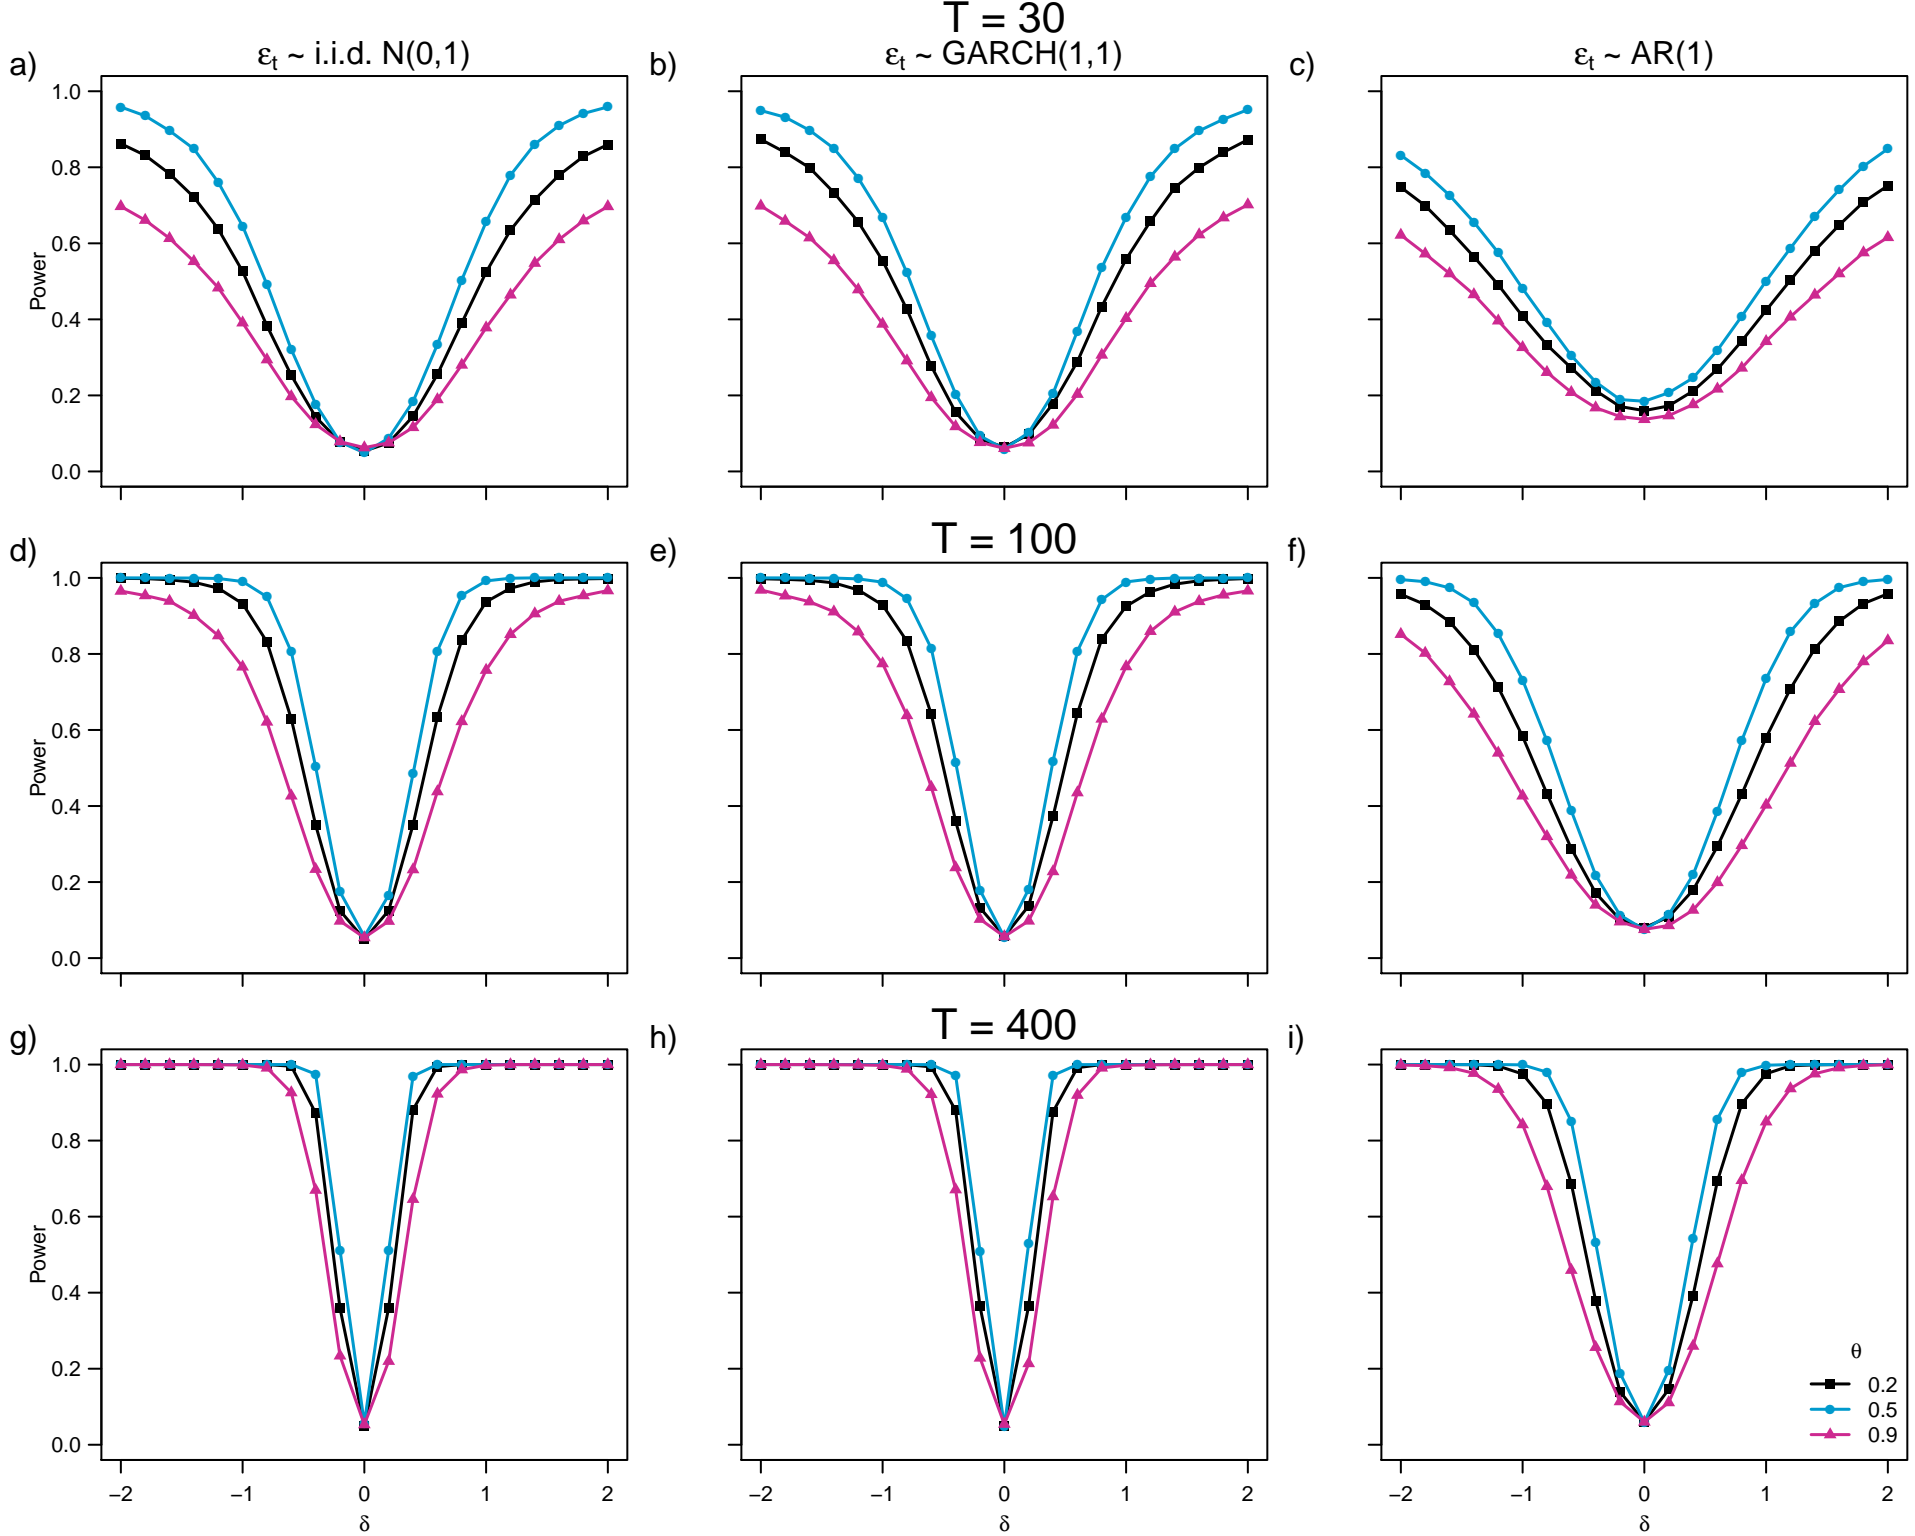

Supplement: Supplementary file 9 [file 15164303]

a)

Early summer anoxic volume ( $\text{km}^3$ )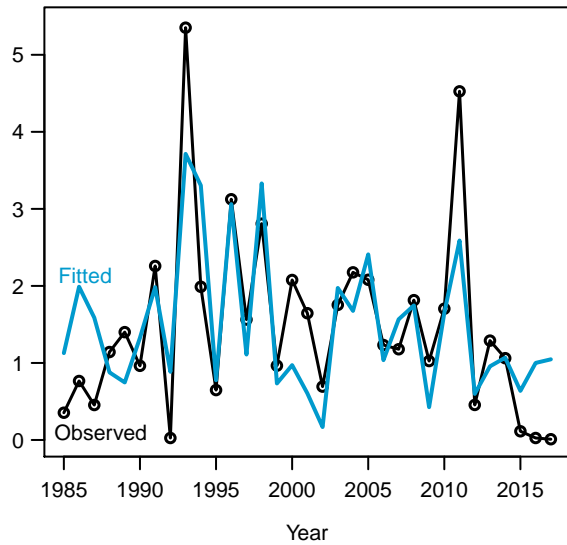

b)

Residuals ( $\text{km}^3$ )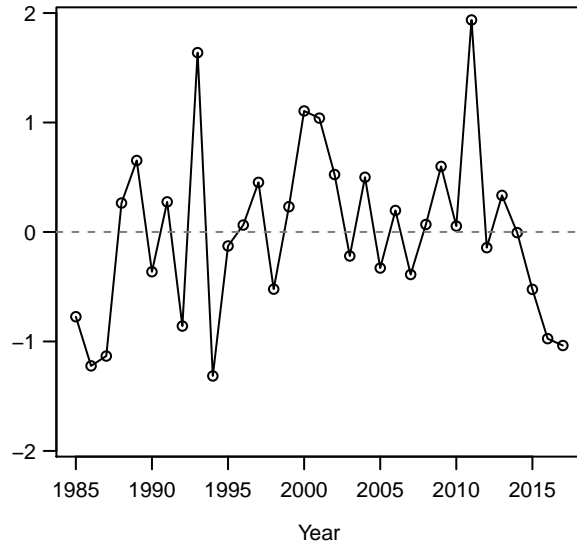

c)

ACF of residuals

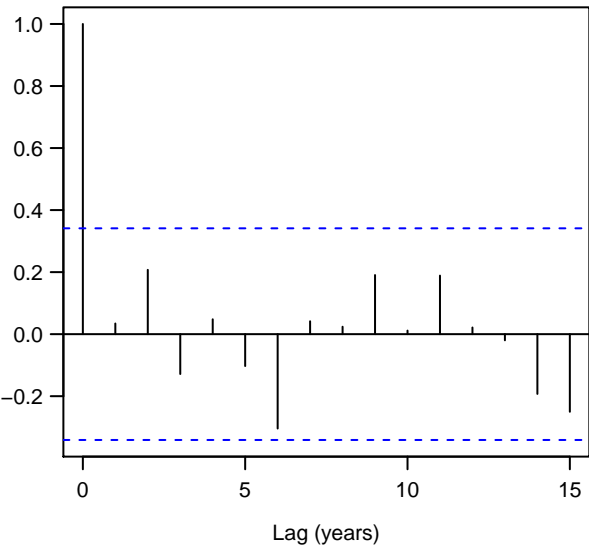

Supplement: Supplementary file 10 [file 15164303]

a)

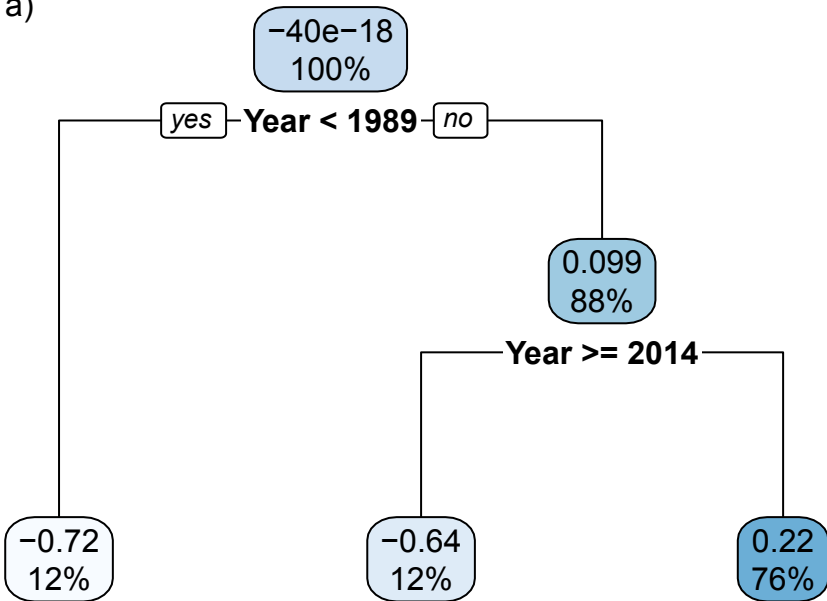

b)

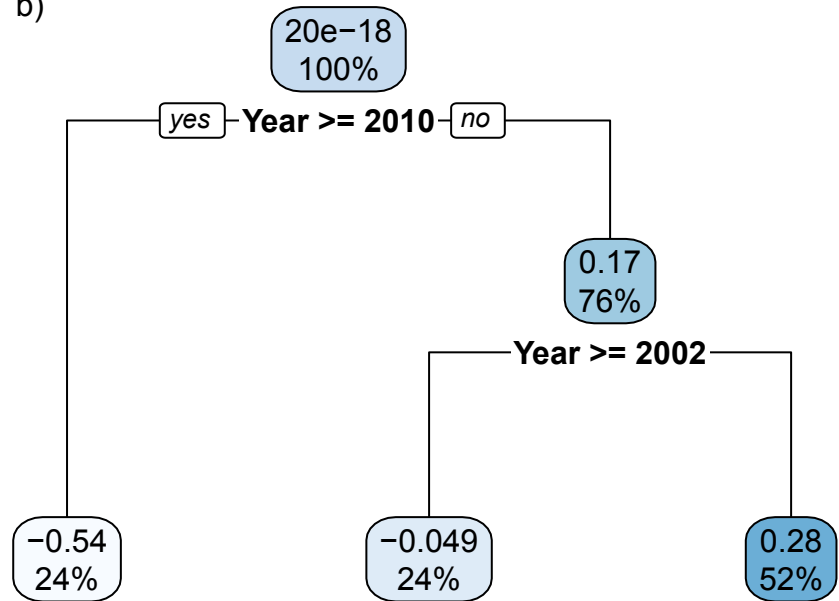

Supplement: Supplementary file 11 [file 15164303]
